# Supplementary material for: Whiter, brighter, and more stable cellulose paper coated with antibacterial carboxymethyl starch stabilized ZnO nanoparticles
Source: Royal Society of Chemistry journal article supplement (doi:10.1039/c3tb21734e), 2014-01-01
Supplement: c3tb21734e1.pdf [file c3tb21734e1.pdf]

## Support information

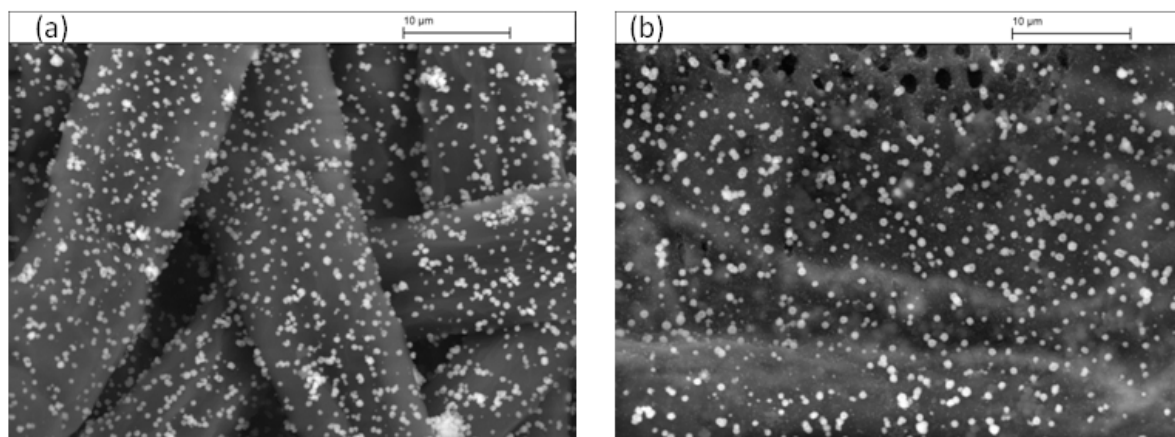

Fig. 1 SEM images of the ZnO/CMS loaded papers (a) before antibacterial test and (b) after antibacterial test and ethanol washing.
